# Supplementary material for: Micrococcal nuclease sequencing of porcine sperm suggests enriched co-location between retained histones and genomic regions related to semen quality and early embryo development
Source: PeerJ journal article supplement (doi:10.7717/peerj.15520), 2023-06-21

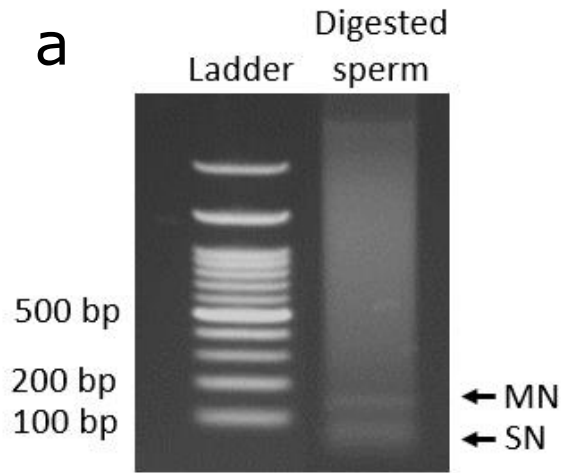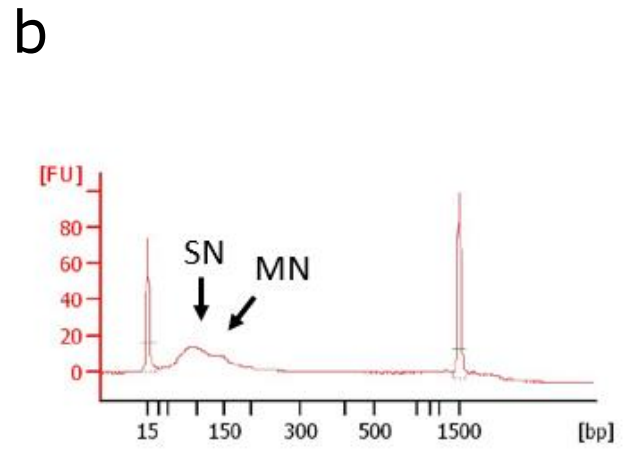

Supplement: Fig_S1.pdf [file Fig_S1.pdf]
